# Supplementary material
Source: publisher site journal article supplement (https://www.dovepress.com/article/351416)
Supplement: Supplementary file 1 [file get_supplementary_file.php]

Supplementary

**Materials and methods**

**1.** **Etiological diagnostic criteria of acute pancreatitis**

| etiology | diagnostic criteria |
| --- | --- |
| Biliary | diagnose calculi in the gallbladder and/or common bile duct by any imaging method (CT, MRI, ultrasound, etc.) |
| Alcoholic | alcohol intake >80g/day for more than 5 consecutive years |
| Hyperlipidemic | blood triglyceride level reached 11.3 mmol/L after fasting |
| Idiopathic | the etiology cannot be determined after detailed imaging and clinical examination |

**2.Detailed experimental methods for patient whole genome sequencing**

DNA extracted from whole blood samples was randomly broken into approximately 350 bp fragments by Covaris Disruptor. After terminal repair and "A" tail addition, sequencing adapters were connected at both ends of the fragment，the DNA library created by the established Illumina paired-end protocols Raw data were submitted to FASTQ software 1 to remove low-quality reads, and the effective sequencing data were further compared with GRCh37, a reference human genome, by employing Burrows-Wheeler Aligner. The initial comparison results were obtained and sorted by SAMtools. Sambamba2 tools were used to mark the duplicate reads. The insertion and deletion (InDel) together with single nucleotide variants (SNVs) were called via SAMtools. Then, the following criteria were used for further filtering: 1) read depth was greater than 4; 2) root-mean-square mapping quality of the covering reads was greater than 30; and 3) variant quality score was greater than 20. Control-FREEC software was employed to determine the copy number variants (CNVs).3 The structural variants (SVs) were detected with LUMPY software.4 Annotated a small number of allele frequencies were acquired from public control datasets, together with conservative and hazard scores, to further screen and evaluate the potential pathogenicity of variation by ANNOVAR.5 Rare variants were filtered as follows: (1) Variants with frequencies greater than 0.01 in at least one of the gnomAD data (i.e., gnomAD_EAS and gnomAD_ALL),6 ESP6500 database7, and 1000 genomic data8were removed; (2) Only SNVs in the exonic or splicing sites (upper and lower 10 bp) were retained; (3) The synonymous SNVs predicted by dbscSNV to be unrelated to amino acid alternation were removed and the repeat region small fragment (<10 bp) noncode shifting InDels that were defined via RepeatMasker were also removed; (4) The variations were filtered through the software programs SIFT,9 Polyphen,10 Mutation Taster11, and CADD12. If more than half of the four software programs revealed that the variations could be harmful, then these variations were retained.13 Splicing site variations less than 2 bp away from the exon region and variations predicted by dbscSNV to affect splicing were retained.

The variants obtained after rare variant filtering and damaging prediction with a call rate greater than 0.8 were reserved. Variant statistics were carried out based on Gene Ontology (GO) enrichment analysis. Fisher's exact test was utilized to assess the statistical significance and pathways that were enriched via Kyoto Encyclopedia of Genes and Genomes (KEGG), and a 0.05 probability level was applied as the threshold of significance, focusing on the pathways that were significantly different between the two groups.

**3. Detailed experimental methods for DIA- proteomic sequencing of rat pancreatic tissue:**

First, the pancreatic tissue of IEP rats (n=5) and ANP rats (n=5) was homogenized using an MP FastPrep-24 homogenizer (24×2, 6.0 M/S, 60 s, twice). SDT buffer (100 mM DTT, 4% SDS, 150 mM Tris-HCl, pH 8.0) was then added. The lysates were further sonicated, and boiled for 15 min. After centrifuged at 14000g for 40 min, the supernatant was quantified with the BCA Protein Assay Kit (Bio-Rad, USA). Aliquots of each sample were mixed into one sample for quality control and data-independent acquisition (DDA) library construction. Protein digestion was implemented in accordance with the filter-aided sample preparation procedure.14,15 DDA analysis was performed with a high-performance liquid chromatography system Easy nLC-1200 (Thermo Scientific). Buffer A：0.1% formic acid (FA, 06450, Fluka); buffer B：0.1% FA, 84% Acetonirile (ACN，I592230123, Merck). The column was balanced with 95% buffer A. The peptide was first loaded onto an EASY-Spray TM C18 Trap column (Thermo Scientific, P/N 164946, 3 um, 75 um*2 cm), then separated on an EASY-Spray TM C18 LC Analytical Column (Thermo Scientific, ES802, 2 um, 75 um*25 cm) with a linear gradient of buffer B at a flow rate of 250nl /min over 90 min. Liquid separation gradient of buffer B is as follows: 0-40min, the linear gradient is from 8% to 30%; 40-50min, linear gradient is from 30% to 100%; 50-65min, the linear gradient increased to 100% and maintained. The separated samples were analyzed by Q-Exactive HFX mass spectrometer (Thermo Scientific). MS detection method was positive ion, the scan range was 300-1800m/z, resolution for MS1 scan was 60000 at 200 m/z, target of automatic gain control (AGC) was 3e6, maximum injection time (IT) was 50ms. Each full MS–SIM scan followed 20 MS2 scans. Resolution for MS2 scan was 30000, AGC target was 3e6, maximum IT was 120ms and normalized collision energy was 27eV. DDA data were directly imported into Spectronaut software (SpectronautTM 14.4.200727.47784) to construct a spectral library. The database can be downloaded from the following website: <http://www.uniprot.org>. All of the data reported were based on a protein identification confidence of 99% as defined through a false discovery rate (FDR)≤1%. Each sample was mixed with 2μg iRT standard peptide and DIA mass spectrometry was performed. Each DIA cycle contained one full MS–SIM scan, and 30 DIA scans covered a mass range of 350–1650 m/z with the following settings: SIM full scan resolution was 60,000 at 200 m/z; AGC: 3e6; maximum IT: 50ms. DIA scans were set at a resolution of 30,000; AGC: 3e6; maximum IT: auto; normalized collision energy was 30eV. DIA data were analyzed with Spectronaut searching against the as-established spectral library. All results were filtered based on FDR < 1%. Differentially expressed proteins (DEPs) between two groups were selected with a fold change (FC) greater than 1.5 or lower than 0.67 and a *p* value less than 0.05 (Student’s t test). They were annotated with GO and KEGG, and further bioinformatic analysis was performed.

Target proteins with high feasibility that were obtained from the DIA proteomics analysis were chosen so that their actual expression level could be detected through LC-PRM/MS. The preparation process of the samples was the same as that of the DIA proteomic assay. Then, 20 fmol of standard peptide was added to each sample for detection. An Easy nLC HPLC system (Thermo Scientific) was used for chromatographic separation. The peptides were isolated by utilizing linear gradient buffer (0.1% formic acid and 84% acetonitrile) with a flow rate of 300nL per min. The separated samples were analyzed through PRM on a Q-Exactive HF mass spectrometer (Thermo Scientific) in a positive ion manner for an hour. The MS scan resolution and AGC target were 60000 (m/z 200) and 3e6, respectively, and the maximum injection time was 200 ms. After conducting each complete MS scan, 20 MS2 scans were gathered based on the inclusion list. Finally, Skyline 3.5.0 (MacCoss Lab, University of Washington) was used for data analysis of the PRM original files.

1. Chen S, Zhou Y, Chen Y, Gu J. fastp: an ultra-fast all-in-one FASTQ preprocessor. *Bioinformatics.* 2018;34(17):i884-i890.

2. Tarasov A, Vilella AJ, Cuppen E, Nijman IJ, Prins P. Sambamba: fast processing of NGS alignment formats. *Bioinformatics.* 2015;31(12):2032-2034.

3. Boeva V, Popova T, Bleakley K, et al. Control-FREEC: a tool for assessing copy number and allelic content using next-generation sequencing data. *Bioinformatics.* 2012;28(3):423-425.

4. Layer RM, Chiang C, Quinlan AR, Hall IM. LUMPY: a probabilistic framework for structural variant discovery. *Genome Biol.* 2014;15(6):R84.

5. Wang K, Li M, Hakonarson H. ANNOVAR: functional annotation of genetic variants from high-throughput sequencing data. *Nucleic Acids Res.* 2010;38(16):e164.

6. gnomAD. Available at: <https://doi.org/10.1101/030338>. Accessed February/21, 2017.

7. Exome Variant Server, NHLB GO Exome Sequencing Project (ESP), Seattle, WA. Available at: <http://evs.gs.washington.edu/EVS>. Accessed February/21, 2017.

8. Genomes Project C, Auton A, Brooks LD, et al. A global reference for human genetic variation. *Nature.* 2015;526(7571):68-74.

9. Kumar P, Henikoff S, Ng PC. Predicting the effects of coding non-synonymous variants on protein function using the SIFT algorithm. *Nat Protoc.* 2009;4(7):1073-1081.

10. Adzhubei IA, Schmidt S, Peshkin L, et al. A method and server for predicting damaging missense mutations. *Nat Methods.* 2010;7(4):248-249.

11. Schwarz JM, Rodelsperger C, Schuelke M, Seelow D. MutationTaster evaluates disease-causing potential of sequence alterations. *Nat Methods.* 2010;7(8):575-576.

12. Kircher M, Witten DM, Jain P, O'Roak BJ, Cooper GM, Shendure J. A general framework for estimating the relative pathogenicity of human genetic variants. *Nat Genet.* 2014;46(3):310-315.

13. Muona M, Berkovic SF, Dibbens LM, et al. A recurrent de novo mutation in KCNC1 causes progressive myoclonus epilepsy. *Nat Genet.* 2015;47(1):39-46.

14. Jian C, Fu J, Cheng X, et al. Low-Dose Sorafenib Acts as a Mitochondrial Uncoupler and Ameliorates Nonalcoholic Steatohepatitis. *Cell Metab.* 2020;31(6):1206.

15. Wisniewski JR, Zougman A, Nagaraj N, Mann M. Universal sample preparation method for proteome analysis. *Nat Methods.* 2009;6(5):359-362.
